# Supplementary material for: Toxoplasma gondii and Neospora caninum Antibodies in Dogs and Cats from Egypt and Risk Factor Analysis
Source: MDPI journal article supplement (doi:10.3390/pathogens11121464), 2022-12-02
Supplement: s1 [file s1]

## Supplementary Materials

**Table S1.** Risk factors for *N. caninum* antibodies in dogs

| Analyzed factor         | No. of Tested | No. of negative (%) | No. of positive (%) | OR (95% CI) *   | <i>p</i> -value # |
|-------------------------|---------------|---------------------|---------------------|-----------------|-------------------|
| <b>Age</b>              |               |                     |                     |                 |                   |
| < 1 year                | 29            | 28 (96.6)           | 1 (3.4)             | Ref             | Ref               |
| 1–3 years               | 91            | 83 (91.2)           | 8 (8.8)             | 2.7 (0.3–22.6)  | 0.686             |
| > 3 years               | 52            | 51 (98.1)           | 1 (1.9)             | 0.5 (0.03–9.1)  | 1.00              |
| <b>Sex</b>              |               |                     |                     |                 |                   |
| Female                  | 78            | 71 (91)             | 7 (9)               | Ref             | Ref               |
| Male                    | 94            | 91 (96.8)           | 3 (3.2)             | 0.3 (0.08–1.3)  | 0.188             |
| <b>Location</b>         |               |                     |                     |                 |                   |
| Kafr Elsheikh           | 50            | 46 (92)             | 4 (8)               | 1 (0.2–4.2)     | 1                 |
| Giza                    | 50            | 46 (92)             | 4 (8)               | Ref             | Ref               |
| Alexandria              | 36            | 36 (100)            | 0                   | 0.1 (0.007–2.7) | 0.136             |
| Luxor                   | 13            | 12 (92.3)           | 1 (7.7)             | 1 (0.1–9.3)     | 1.00              |
| Red Sea                 | 23            | 22 (95.7)           | 1 (4.3)             | 0.5 (0.06–5)    | 1.00              |
| <b>Ownership status</b> |               |                     |                     |                 |                   |
| Stray                   | 81            | 76 (93.8)           | 5 (6.2)             | Ref             | Ref               |
| Companion               | 55            | 50 (92)             | 5 (8)               | 1.5 (0.4–5.5)   | 0.525             |
| Watchdog                | 36            | 36 (100)            | 0                   | 0.2 (0.01–3.5)  | 0.321             |
| <b>Breeds</b>           |               |                     |                     |                 |                   |
| Native Baladi           | 75            | 70 (93.3)           | 5 (6.7)             | Ref             | Ref               |
| Others                  | 97            | 93 (95.9)           | 4 (4.1)             | 0.6 (0.2–2.3)   | 0.505             |

# Odds ratio at 95% confidence interval as calculated by <http://vassarstats.net/>.

\* *p* value was evaluated by Fisher exact probability test (two-tailed).

Ref.; value used as a reference.

**Table S2.** Risk factors for *T. gondii* antibodies in cats.

| Analyzed factor | No. of Tested | No. of negative (%) | No. of positive (%) | OR (95% CI) *    | <i>p</i> -value # |
|-----------------|---------------|---------------------|---------------------|------------------|-------------------|
| <b>Age</b>      |               |                     |                     |                  |                   |
| ≤ 2 year        | 31            | 30 (96.8)           | 1 (3.2)             | Ref              | Ref               |
| > 2 years       | 20            | 16 (80)             | 4 (20)              | 7.5 (0.8–72.9)   | 0.071             |
| <b>Sex</b>      |               |                     |                     |                  |                   |
| Female          | 27            | 24 (88.9)           | 3 (11.1)            | Ref              | Ref               |
| Male            | 24            | 22 (91.7)           | 2 (8.3)             | 1.35 (0.20–9.02) | 1.00              |
| <b>Location</b> |               |                     |                     |                  |                   |
| Kafr Elsheikh   | 15            | 12 (80)             | 3 (20)              | Ref              | Ref               |
| Cairo           | 24            | 22 (91.7)           | 2 (8.3)             | 0.7 (0.1–4.8)    | 0.35              |
| Qena            | 4             | 4 (100)             | 0                   | 0.8 (0.03–17.8)  | 1.00              |
| Red Sea         | 8             | 8 (100)             | 0                   | 0.4 (0.02–8.8)   | 1.00              |
| <b>Breeds</b>   |               |                     |                     |                  |                   |
| Persian         | 33            | 31 (93.9)           | 2 (6.1)             | Ref              | Ref               |
| Siamese         | 6             | 4 (66.7)            | 2 (33.3)            | 7.8 (0.8–71.3)   | 0.104             |
| Others          | 12            | 11 (91.7)           | 1 (8.3)             | 1.4 (0.1–17.3)   | 1.00              |

# Odds ratio at 95% confidence interval as calculated by <http://vassarstats.net/>.

\* *p* value was evaluated by Fisher exact probability test (two-tailed).

Ref.; value used as a reference.
